# Supplementary material for: The Epidemiology of Young People’s Work and Experiences of Violence in Nine Countries: Evidence from the Violence against Children Surveys
Source: MDPI journal article supplement (doi:10.3390/ijerph192416936), 2022-12-16
Supplement: s1 [file s1]

**Supplementary Table S1: Measures of work in the Violence Against Children Surveys (VACS)**

| Work Variable  | Country                                                                                                                                            |                                                                                                                                                                                                                                                                                                                                                                                                                                                   |          |                                                                                                                                                                                                                                            |        |                                                                                                                                                                                                                                                                                                                                                                                                |        |          |        |
|----------------|----------------------------------------------------------------------------------------------------------------------------------------------------|---------------------------------------------------------------------------------------------------------------------------------------------------------------------------------------------------------------------------------------------------------------------------------------------------------------------------------------------------------------------------------------------------------------------------------------------------|----------|--------------------------------------------------------------------------------------------------------------------------------------------------------------------------------------------------------------------------------------------|--------|------------------------------------------------------------------------------------------------------------------------------------------------------------------------------------------------------------------------------------------------------------------------------------------------------------------------------------------------------------------------------------------------|--------|----------|--------|
|                | Colombia                                                                                                                                           | El Salvador                                                                                                                                                                                                                                                                                                                                                                                                                                       | Honduras | Kenya                                                                                                                                                                                                                                      | Malawi | Nigeria                                                                                                                                                                                                                                                                                                                                                                                        | Zambia | Zimbabwe | Uganda |
| Past year work | In the last 12 months did you engage in any work as an employee, or self-employed individual?<br><br>1=Yes<br>2=No<br>98=Don't know<br>99=Declined |                                                                                                                                                                                                                                                                                                                                                                                                                                                   |          | In the last 12 months, how often have you worked for money or any other payment/goods?<br><br>1=Throughout the year<br>2=Seasonally/Part of the year<br>3=Once in a while<br>4=Not at all<br>99=No response                                |        | At any time during the past 12 months did you engage in any work?<br><br>1=Yes<br>2=No<br>99=Don't know/declined                                                                                                                                                                                                                                                                               |        |          |        |
| Worksite       | Data not comparable                                                                                                                                | Where did you carry out your main work during the past 12 months?<br><br>1=At family dwelling (domestic work/foods for sale/handicraft products)<br>2=Formal office<br>3=Factory/workshop<br>4=Farm/garden<br>5=Construction site<br>6=Mine/quarry<br>7=Shop/kiosk<br>8=Restaurant/hotel/café, bar<br>9=Different places (mobile)<br>10=Fixed, street or market stall<br>11=Pond/lake/river<br>88=Other (specify)<br>98=Don't know<br>99=Declined |          | In the last 12 months when you were working for money/goods did you work in a mine, work over open flames, work with sharp tools such as a machete, work with heavy equipment, or work in a factory?<br><br>1=Yes<br>2=No<br>3=No response |        | Where did you carry out your main work during the past 12 months?<br><br>1=At family dwelling<br>2=Formal office<br>3=Factory/workshop<br>4=Farm/Garden<br>5=Construction site<br>6=Mine/quarry<br>7=Shop/kiosk<br>8=Restaurant/hotel/café, bar<br>9=Different places (mobile)<br>10=Fixed, street or market stall<br>11=Pond/lake/river<br>88=Other (specify)<br>98=Don't know<br>99=Declined |        |          |        |

| Work Variable   | Country                                                                                                                                                                                                                                                        |                                                                                                                                                                                                                                                                 |          |                                                                                                                                                                                                                                                                            |           |         |        |                                                                                                                                                                                                                                                                                                                       |                                                                                                                                                                                                                                                 |
|-----------------|----------------------------------------------------------------------------------------------------------------------------------------------------------------------------------------------------------------------------------------------------------------|-----------------------------------------------------------------------------------------------------------------------------------------------------------------------------------------------------------------------------------------------------------------|----------|----------------------------------------------------------------------------------------------------------------------------------------------------------------------------------------------------------------------------------------------------------------------------|-----------|---------|--------|-----------------------------------------------------------------------------------------------------------------------------------------------------------------------------------------------------------------------------------------------------------------------------------------------------------------------|-------------------------------------------------------------------------------------------------------------------------------------------------------------------------------------------------------------------------------------------------|
|                 | Colombia                                                                                                                                                                                                                                                       | El Salvador                                                                                                                                                                                                                                                     | Honduras | Kenya                                                                                                                                                                                                                                                                      | Malawi    | Nigeria | Zambia | Zimbabwe                                                                                                                                                                                                                                                                                                              | Uganda                                                                                                                                                                                                                                          |
| Decision-making | <p>Who usually decides how the money you earn will be used?</p> <p>1=I decide<br/>2=I decide jointly with someone<br/>3=My husband decides<br/>4=My boyfriend decides<br/>5=My parents decide<br/>6=Someone else decides<br/>98=Don't know<br/>99=Declined</p> | <p>Who usually decides how the money you earn will be used?</p> <p>1=I decide<br/>2=My husband decides<br/>3=My boyfriend decides<br/>4=My parents decides<br/>5=Someone else decides<br/>6=I decide jointly with someone<br/>98=Don't know<br/>99=Declined</p> |          | <p>In the past 12 months, when you were working for money or other payment, who mainly decides how to spend the money you earn?</p> <p>1=Respondent<br/>2=Husband/Partner<br/>3=Parent decide<br/>4=Respondent and someone else jointly<br/>5=Other<br/>99=No response</p> | Not asked |         |        | <p>In the past 12 months, when you were working for money or other payment, who mainly decided how to spend the money you earned?</p> <p>1=I decide<br/>2=My husband decides<br/>3=My boyfriend decides<br/>4=My parents decides<br/>5=Someone else decides<br/>6=I decide jointly with someone<br/>98=Don't know</p> | <p>Who usually decides how the money you earn will be used?</p> <p>1=I decide<br/>2=My husband decides<br/>3=My boyfriend decides<br/>4=My parents decides<br/>5=Someone else decides<br/>6=I decide jointly with someone<br/>98=Don't know</p> |

**Supplementary Table S2: Worksites and decision making about money among young people aged 13-24 years**

| Female      |           |             |                       |       |              |       |                  |       |                     |       |       |       |                                              |       |                |       |                 |       |                |       |                      |      |
|-------------|-----------|-------------|-----------------------|-------|--------------|-------|------------------|-------|---------------------|-------|-------|-------|----------------------------------------------|-------|----------------|-------|-----------------|-------|----------------|-------|----------------------|------|
| Country     | Year      | Sample size | Worksites (past year) |       |              |       |                  |       |                     |       |       |       | Decision making about money earned from work |       |                |       |                 |       |                |       |                      |      |
|             |           |             | Family dwelling       |       | Farm/ garden |       | Shop/ restaurant |       | Hazardous work site |       | Other |       | I decide                                     |       | Joint decision |       | Partner decides |       | Parent decides |       | Someone else decides |      |
|             |           |             | n                     | %     | n            | %     | n                | %     | n                   | %     | n     | %     | n                                            | %     | n              | %     | n               | %     | n              | %     | n                    | %    |
| Colombia    | 2018      | 1406        | Not comparable        |       |              |       |                  |       |                     |       |       |       | 418                                          | 90.7% | 42             | 7.8%  | 9               | 0.7%  | 8              | 0.8%  | 2                    | 0    |
| El Salvador | 2017      | 1056        | 88                    | 32.3% | 9            | 3.3%  | 93               | 36.9% | 33                  | 10.1% | 45    | 17.4% | 189                                          | 75.8% | 21             | 10.8% | 4               | 0.8%  | 25             | 11.3% | 3                    | 1.3% |
| Honduras    | 2017      | 2537        | 285                   | 40.5% | 56           | 7.9%  | 176              | 23.1% | 51                  | 7.6%  | 154   | 20.9% | 563                                          | 83.3% | 41             | 5.5%  | 8               | 1.1%  | 57             | 8.7%  | 5                    | 1.4% |
| Kenya       | 2010      | 1227        | Not measured          |       |              |       |                  |       |                     |       |       |       | 221                                          | 63%   | 32             | 9.0%  | 35              | 8%    | 63             | 17.0% | 10                   | 3.0% |
| Malawi      | 2013      | 1029        | 484                   | 60.6% | 183          | 26.1% | 16               | 1.1%  | 39                  | 4.9%  | 61    | 7.3%  | Not measured                                 |       |                |       |                 |       |                |       |                      |      |
| Nigeria     | 2014      | 1766        | 411                   | 47.1% | 164          | 18.6% | 180              | 19.3% | 45                  | 3.8%  | 107   | 11.2% | Not measured                                 |       |                |       |                 |       |                |       |                      |      |
| Uganda      | 2015      | 3,159       | 582                   | 36.9% | 794          | 41.5% | 198              | 11.3% | 32                  | 2.6%  | 121   | 7.7%  | 295                                          | 61.0% | 60             | 6.2%  | 59              | 11.5% | 92             | 19.0% | 18                   | 2.3% |
| Zambia      | 2014/2015 | 891         | 57                    | 23.5% | 96           | 33.7% | 45               | 17.0% | 11                  | 4.5%  | 51    | 21.3% | Not measured                                 |       |                |       |                 |       |                |       |                      |      |
| Zimbabwe    | 2017      | 7912        | 662                   | 43.7% | 316          | 20.3% | 372              | 23.9% | 78                  | 5.2%  | 116   | 6.9%  | 570                                          | 78.8% | 33             | 4.8%  | 16              | 2.5%  | 77             | 9.9%  | 28                   | 4.0% |
| Male        |           |             |                       |       |              |       |                  |       |                     |       |       |       |                                              |       |                |       |                 |       |                |       |                      |      |
| Colombia    | 2018      | 1299        | Not comparable        |       |              |       |                  |       |                     |       |       |       | 526                                          | 86.7% | 46             | 6.7%  | 7               | 0.4%  | 35             | 6.2%  | 0                    | 0.0% |
| El Salvador | 2017      | 1380        | 49                    | 8.3%  | 250          | 43.6% | 55               | 7.9%  | 178                 | 29.2% | 69    | 11.1% | 414                                          | 78.0% | 34             | 5.4%  | 8               | 1.9%  | 68             | 13.6% | 5                    | 1.1% |
| Honduras    | 2017      | 2659        | 166                   | 10.6% | 633          | 43.1% | 101              | 5.9%  | 476                 | 29.1% | 204   | 11.3% | 1101                                         | 78.5% | 92             | 6.3%  | 21              | 1.3%  | 189            | 13.7% | 4                    | 0.3% |
| Kenya       | 2010      | 1456        | Not measured          |       |              |       |                  |       |                     |       |       |       | 476                                          | 71.0% | 24             | 3.0%  | 5               | 0.4%  | 148            | 23.0% | 17                   | 3.0% |
| Malawi      | 2013      | 1133        | 387                   | 39.1% | 274          | 34.7% | 59               | 5.9%  | 115                 | 11.0% | 88    | 9.4%  | Not measured                                 |       |                |       |                 |       |                |       |                      |      |
| Nigeria     | 2014      | 2437        | 359                   | 20.5% | 807          | 44.2% | 156              | 7.9%  | 315                 | 16.7% | 186   | 10.8% | Not measured                                 |       |                |       |                 |       |                |       |                      |      |
| Uganda      | 2015      | 2,645       | 500                   | 36.7% | 690          | 42.7% | 50               | 3.9%  | 126                 | 8.7%  | 114   | 8.0%  | 297                                          | 62.0% | 43             | 8.0%  | 2               | 0.3%  | 129            | 26.1% | 18                   | 3.4% |
| Zambia      | 2014/2015 | 928         | 198                   | 37.7% | 130          | 24.1% | 46               | 7.6%  | 82                  | 14.1% | 99    | 16.5% | Not measured                                 |       |                |       |                 |       |                |       |                      |      |
| Zimbabwe    | 2017      | 803         | 107                   | 29.8% | 99           | 29.8% | 34               | 9.7%  | 68                  | 20.8% | 31    | 10.0% | 80                                           | 67%   | 7              | 4.9%  | 3               | 2%    | 22             | 15%   | 11                   | 10%  |

Notes:

Percentages, n, and 95% CIs are survey weighted. Sample sizes represents the unweighted sample.

In all countries except Kenya, hazardous work includes working in a factory/workshop, construction site, mine/quarry. In Kenya hazardous work includes working in a mine, over open flames, with sharp tools such as a machete, with heavy equipment, in a factory

Shop/restaurant includes: working in a shop/kiosk or a restaurant/hotel/café/bar or in a fix, street or market stall

Decision making about money earned from work: In the Kenya VACS participants could not select "someone else decides", but could select "other"

| Girls and young women     |                           |                           |                            |                              |
|---------------------------|---------------------------|---------------------------|----------------------------|------------------------------|
| <p>A. Zambia (n = 36)</p> | <p>B. Malawi (n = 43)</p> | <p>C. Kenya (n = 394)</p> | <p>D. Nigeria (n = 74)</p> | <p>E. Zimbabwe (n = 472)</p> |
| Boys and young men        |                           |                           |                            |                              |
| <p>A. Zambia (n = 62)</p> | <p>B. Malawi (n = 55)</p> | <p>C. Kenya (n = 796)</p> | <p>D. Nigeria (n = 62)</p> | <p>E. Zimbabwe (n = 17)</p>  |

Notes: No stemming or word correction has been done. Number of observations reflect number of respondents answering survey question, not number of word responses. Word frequencies  $\geq 2$  are shown. R Brewer Paired color palette is used (diverging color palette, set at 8 colours). Most frequent words are shown as the largest and are in orange, second most frequent are in red, least frequent words are the smallest and in light blue. No open text responses in El Salvador, Honduras, Colombia

**Supplementary Table S3: Childhood violence and work in a hazardous worksite in the past year among young people aged 18-24 years**

| Violence in childhood       | Young women (18-24 years)                      |      |                                               |       |       |       | Young men (18-24 years)                        |      |                                               |      |        |      |
|-----------------------------|------------------------------------------------|------|-----------------------------------------------|-------|-------|-------|------------------------------------------------|------|-----------------------------------------------|------|--------|------|
|                             | No work in hazardous worksite in the past year |      | Work in a hazardous worksite in the past year |       | p     | N     | No work in hazardous worksite in the past year |      | Work in a hazardous worksite in the past year |      | p      | N    |
|                             | %                                              | SE   | %                                             | SE    |       |       | %                                              | SE   | %                                             | SE   |        |      |
|                             | Colombia                                       |      |                                               |       |       |       |                                                |      |                                               |      |        |      |
| Physical or sexual violence | 29.9%                                          | 4.2  | 26.0%                                         | 4.24  | 0.594 | 381   | 29.2%                                          | 3.37 | 25.4%                                         | 4.94 | 0.565  | 350  |
| Sexual violence             | 19.1%                                          | 3.4  | 17.9%                                         | 3.42  | 0.805 | 232   | 9.7%                                           | 2.21 | 13.3%                                         | 4.42 | 0.474  | 98   |
| Physical violence           | 22.3%                                          | 4.02 | 13.7%                                         | 3.9   | 0.147 | 233   | 25.5%                                          | 3.2  | 19.8%                                         | 4.9  | 0.360  | 291  |
|                             | El Salvador                                    |      |                                               |       |       |       |                                                |      |                                               |      |        |      |
| Physical or sexual violence | 20.5%                                          | 1.77 | 20.7%                                         | 8.28  | 0.981 | 1011  | 14.4%                                          | 1.34 | 20.4%                                         | 5.97 | 0.292  | 1355 |
| Sexual violence             | 12.9%                                          | 1.71 | 20.7%                                         | 8.28  | 0.258 | 922   | 3.5%                                           | 0.61 | 5.3%                                          | 2.15 | 0.341  | 1198 |
| Physical violence           | 13.1%                                          | 1.33 | 3.0%                                          | 3.06  | 0.106 | 931   | 12.5%                                          | 1.32 | 17.5%                                         | 6.21 | 0.390  | 1322 |
|                             | Honduras                                       |      |                                               |       |       |       |                                                |      |                                               |      |        |      |
| Physical or sexual violence | 41.3%                                          | 1.42 | 40.4%                                         | 8.08  | 0.911 | 2469  | 35.5%                                          | 1.35 | 41.7%                                         | 2.72 | 0.042  | 2621 |
| Sexual violence             | 20.5%                                          | 1.18 | 23.3%                                         | 7.15  | 0.688 | 1825  | 11.6%                                          | 0.94 | 17.0%                                         | 2.17 | 0.019  | 1885 |
| Physical violence           | 37.7%                                          | 1.47 | 35.8%                                         | 8.5   | 0.825 | 2,324 | 33.8%                                          | 1.36 | 39.6%                                         | 2.79 | 0.062  | 2538 |
|                             | Kenya                                          |      |                                               |       |       |       |                                                |      |                                               |      |        |      |
| Physical or sexual violence | 78.1%                                          | 2.65 | 79.1%                                         | 5.74  | 0.864 | 1190  | 76.1%                                          | 2.12 | 89.5%                                         | 1.84 | <0.001 | 1150 |
| Sexual violence             | 55.9%                                          | 4.54 | 65.9%                                         | 8.08  | 0.264 | 579   | 33.0%                                          | 3.96 | 67.1%                                         | 5.16 | <0.001 | 199  |
| Physical violence           | 77.0%                                          | 2.82 | 76.6%                                         | 6.44  | 0.946 | 1132  | 75.8%                                          | 2.14 | 89.3%                                         | 1.88 | <0.001 | 1128 |
|                             | Malawi                                         |      |                                               |       |       |       |                                                |      |                                               |      |        |      |
| Physical or sexual violence | 62.1%                                          | 2.9  | 72.8%                                         | 9.36  | 0.370 | 969   | 76.8%                                          | 2.24 | 88.0%                                         | 3.56 | 0.027  | 1102 |
| Sexual violence             | 42.6%                                          | 3.12 | 58.6%                                         | 9.00  | 0.143 | 584   | 40.0%                                          | 4.26 | 67.9%                                         | 9.35 | 0.013  | 400  |
| Physical violence           | 59.6%                                          | 3.35 | 67.4%                                         | 14.4  | 0.648 | 908   | 76.4%                                          | 2.27 | 87.7%                                         | 3.65 | 0.029  | 1086 |
|                             | Nigeria                                        |      |                                               |       |       |       |                                                |      |                                               |      |        |      |
| Physical or sexual violence | 63.2%                                          | 2.01 | 84.6%                                         | 6.49  | 0.019 | 1706  | 62.4%                                          | 1.76 | 68.5%                                         | 3.38 | 0.096  | 2318 |
| Sexual violence             | 41.6%                                          | 2.45 | 72.5%                                         | 11.76 | 0.023 | 1057  | 24.6%                                          | 1.67 | 32.7%                                         | 4.48 | 0.069  | 1164 |
| Physical violence           | 60.0%                                          | 2.16 | 84.0%                                         | 6.67  | 0.011 | 1584  | 61.2%                                          | 1.82 | 66.9%                                         | 3.56 | 0.132  | 2245 |
|                             | Uganda                                         |      |                                               |       |       |       |                                                |      |                                               |      |        |      |
| Physical or sexual violence | 74.6%                                          | 1.76 | 58.7%                                         | 25.29 | 0.471 | 3011  | 78.8%                                          | 1.10 | 88.0%                                         | 2.87 | 0.013  | 2550 |
| Sexual violence             | 58.8%                                          | 2.48 | 35.8%                                         | 25.49 | 0.382 | 1805  | 45.1%                                          | 2.11 | 67.8%                                         | 7.62 | 0.006  | 991  |
| Physical violence           | 72.2%                                          | 1.93 | 54.1%                                         | 26.42 | 0.441 | 2811  | 78.3%                                          | 1.11 | 87.9%                                         | 2.88 | 0.010  | 2493 |
|                             | Zambia                                         |      |                                               |       |       |       |                                                |      |                                               |      |        |      |
| Physical or sexual violence | 53.9%                                          | 2.21 | 35.5%                                         | 17.19 | 0.307 | 846   | 52.6%                                          | 1.92 | 53.9%                                         | 7.15 | 0.865  | 868  |
| Sexual violence             | 34.3%                                          | 2.19 | 10.7%                                         | 10.55 | 0.150 | 606   | 17.1%                                          | 1.72 | 30.9%                                         | 8.22 | 0.052  | 518  |
| Physical violence           | 49.0%                                          | 2.43 | 35.5%                                         | 17.19 | 0.457 | 760   | 50.8%                                          | 1.97 | 50.0%                                         | 7.4  | 0.919  | 827  |
|                             | Zimbabwe                                       |      |                                               |       |       |       |                                                |      |                                               |      |        |      |
| Physical or sexual violence | 24.9%                                          | 0.75 | 21.2%                                         | 5.07  | 0.496 | 1,900 | 25.4%                                          | 2.99 | 37.3%                                         | 6.89 | 0.058  | 196  |
| Sexual violence             | 8.3%                                           | 0.39 | 4.7%                                          | 3.55  | 0.443 | 515   | 0.7%                                           | 0.48 | 1.9%                                          | 1.89 | 0.371  | 4    |
| Physical violence           | 21.7%                                          | 0.76 | 18.0%                                         | 4.69  | 0.459 | 1,594 | 25.4%                                          | 2.99 | 36.5%                                         | 6.91 | 0.077  | 195  |
